# Supplementary material for: Type conversion of secretomes in a 3D TAM2 and HCC cell co-culture system and functional importance of CXCL2 in HCC
Source: PubMed Central journal article supplement (PMC4846822; doi:10.1038/srep24558), 2016-04-27
Supplement: srep24558-s1.pdf [file srep24558-s1.pdf]

## Type conversion of secretomes in a 3D TAM2 and HCC cell co-culture system and functional importance of CXCL2 in HCC

Yu Lu<sup>1\*</sup>, Shan Li<sup>1\*</sup>, Liping Ma<sup>1\*</sup>, Xiaolian Zhang<sup>1</sup>, Qiliu Peng<sup>1</sup>, Cuiju Mo<sup>1</sup>, Li Huang<sup>1</sup>, Xue Qin<sup>1#</sup>, Yinkun Liu<sup>2,3#</sup>

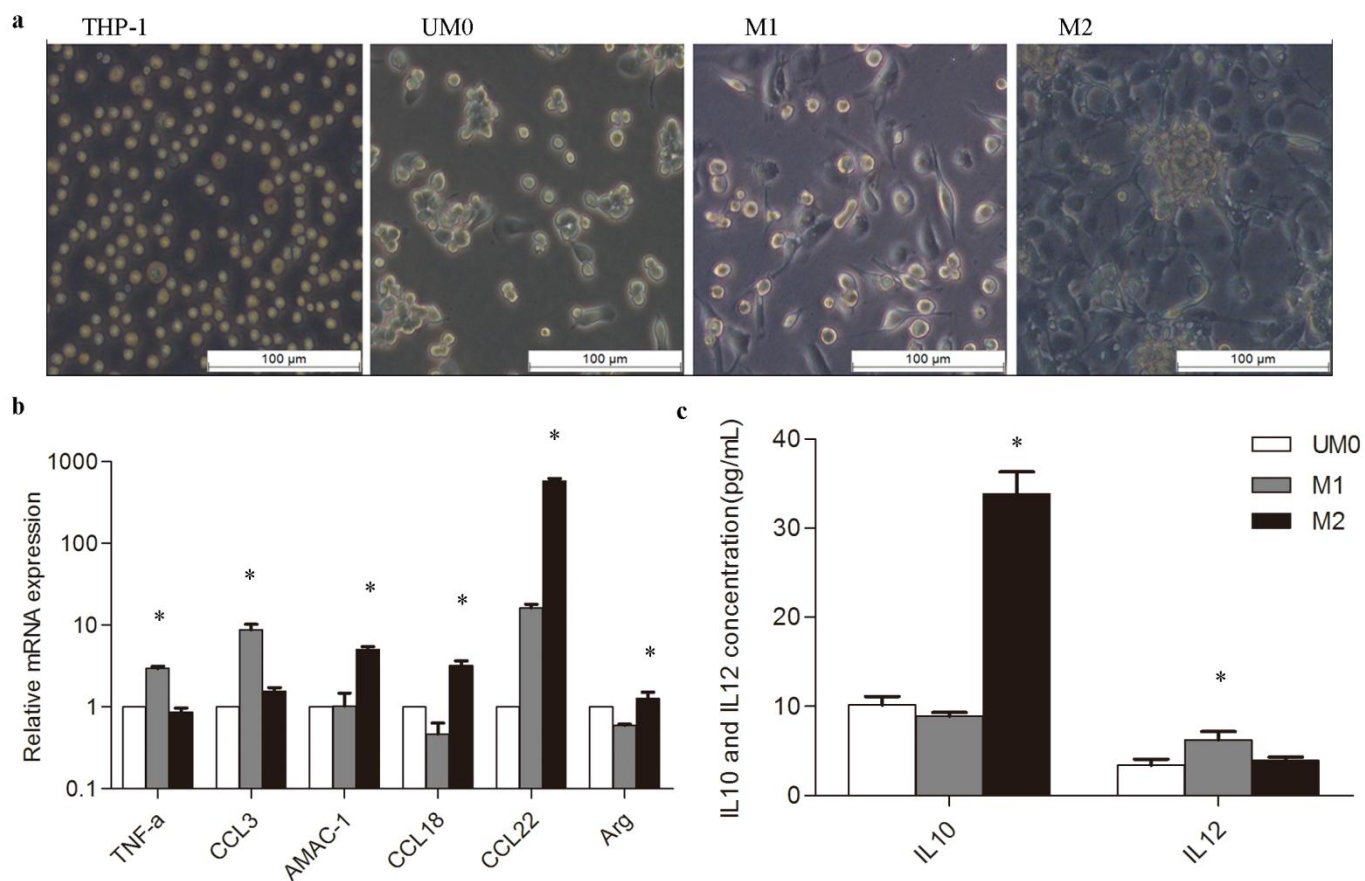

**Figure S1** Characteristics of different macrophage phenotypes. **a** The morphology of undifferentiated macrophages (UM0), classically activated macrophage (M1) and alternatively activated macrophage (M2). The human monocytic cell line THP-1 has been widely used as a model for monocyte/macrophage differentiation. After treatment with PMA for 24 h, round-shaped THP-1 cells quickly stopped proliferating, became attached, and were induced into UM0. The addition of LPS to UM0 lead to elongated, fibroblast-like shaped cells, whereas the stimulation by IL-4 and IL-13 did not induce visible changes in macrophage morphology but led to a longer and disorganized pseudopodium. **b** The mRNA expression of common markers in UM0, M1 and M2. Tumor necrosis factor- $\alpha$  (TNF- $\alpha$ ) and chemokine (C-C motif) ligand (CCL) 3 are characteristic markers for M1, while M2 is characterized by its high expression of alternative macrophage activation-associated CC-chemokine (AMAC)-1, CCL18, CCL22, and arginase (Arg)-1. **c** Cytokine concentration in conditioned medium of UM0, M1 and M2. IL-12<sup>high</sup> IL-10<sup>low</sup> represents the M1 phenotype and IL-12<sup>low</sup> IL-10<sup>high</sup> the M2 phenotype. The results showed a low level of IL-10 ( $8.87 \pm 0.46$  pg/mL) but high levels

of IL-12 ( $33.82 \pm 2.50$  pg/mL) in M1CM, and a high level of IL-10 ( $6.25 \pm 0.92$  pg/mL) but low level of IL-12 ( $2.50 \pm 0.40$  pg/mL) in M2CM. \*  $p < 0.05$  (all compared to the control group using Student's t-test).

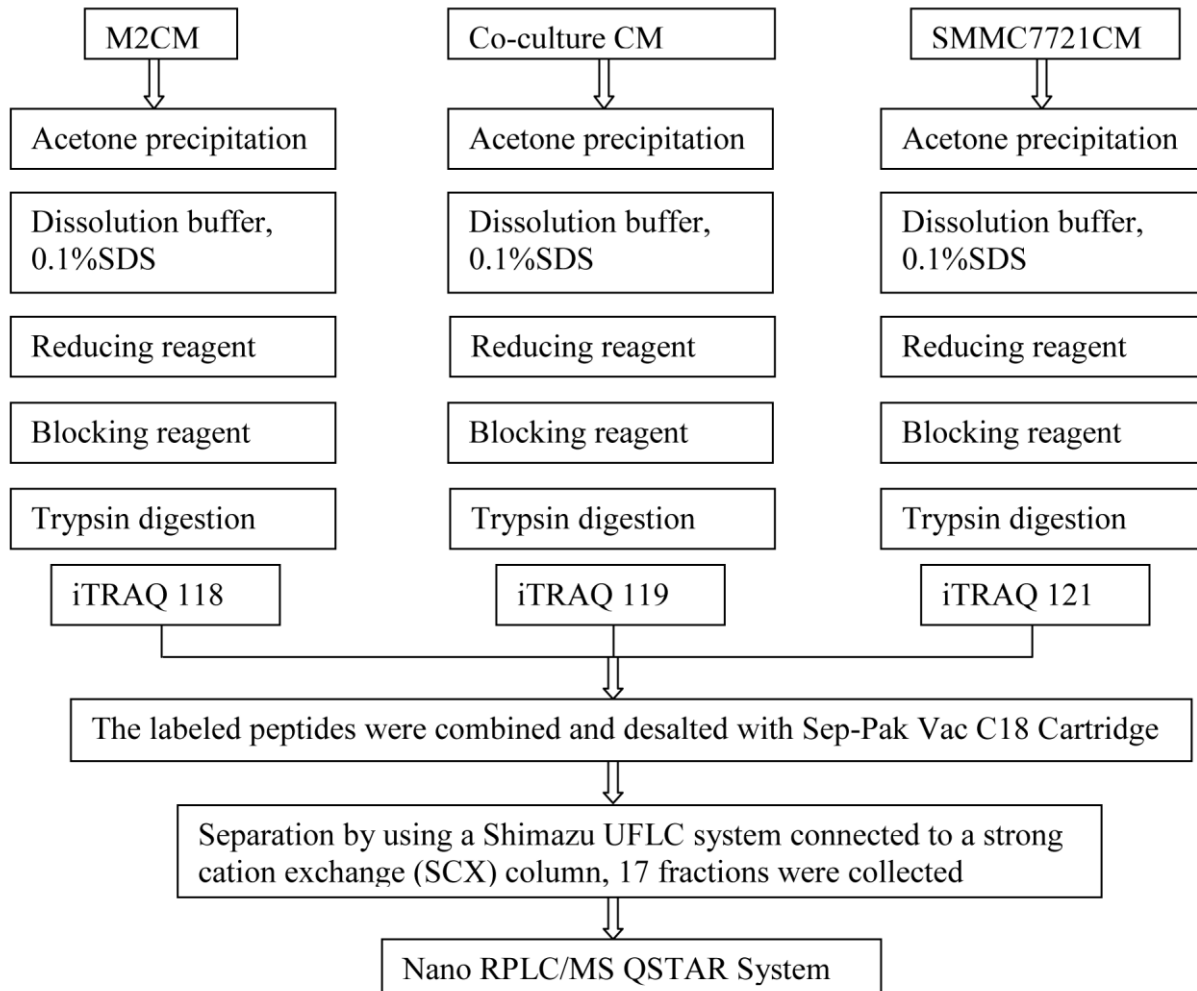

Figure S2 The flow chart of iTRAQ analysis.

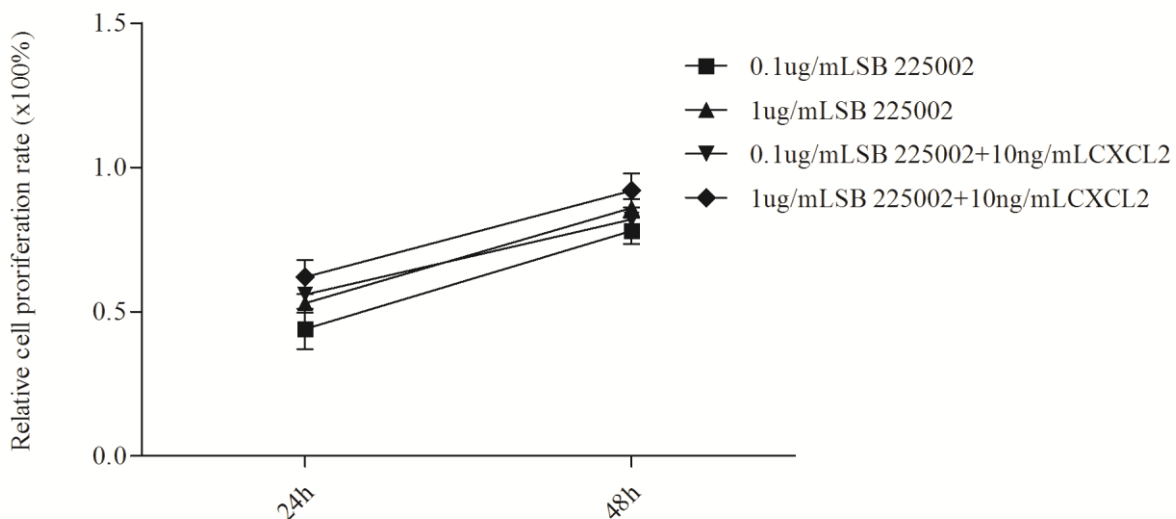

Figure S3 Proliferation assay of SMMC7721 after treated with different does of SB225002. Following 24 hours' treatment with SB225002, proliferation ability of SMMC7721 cells decreased by ~ 40% to 50%, in both 0.1ug/mL and 1ug/mL concentrations, no matter the present or absent of CXCL2. However, after 48 hours' treatment, the inhibition effect of cell proliferation became slow and decreased only ~10%-20%.

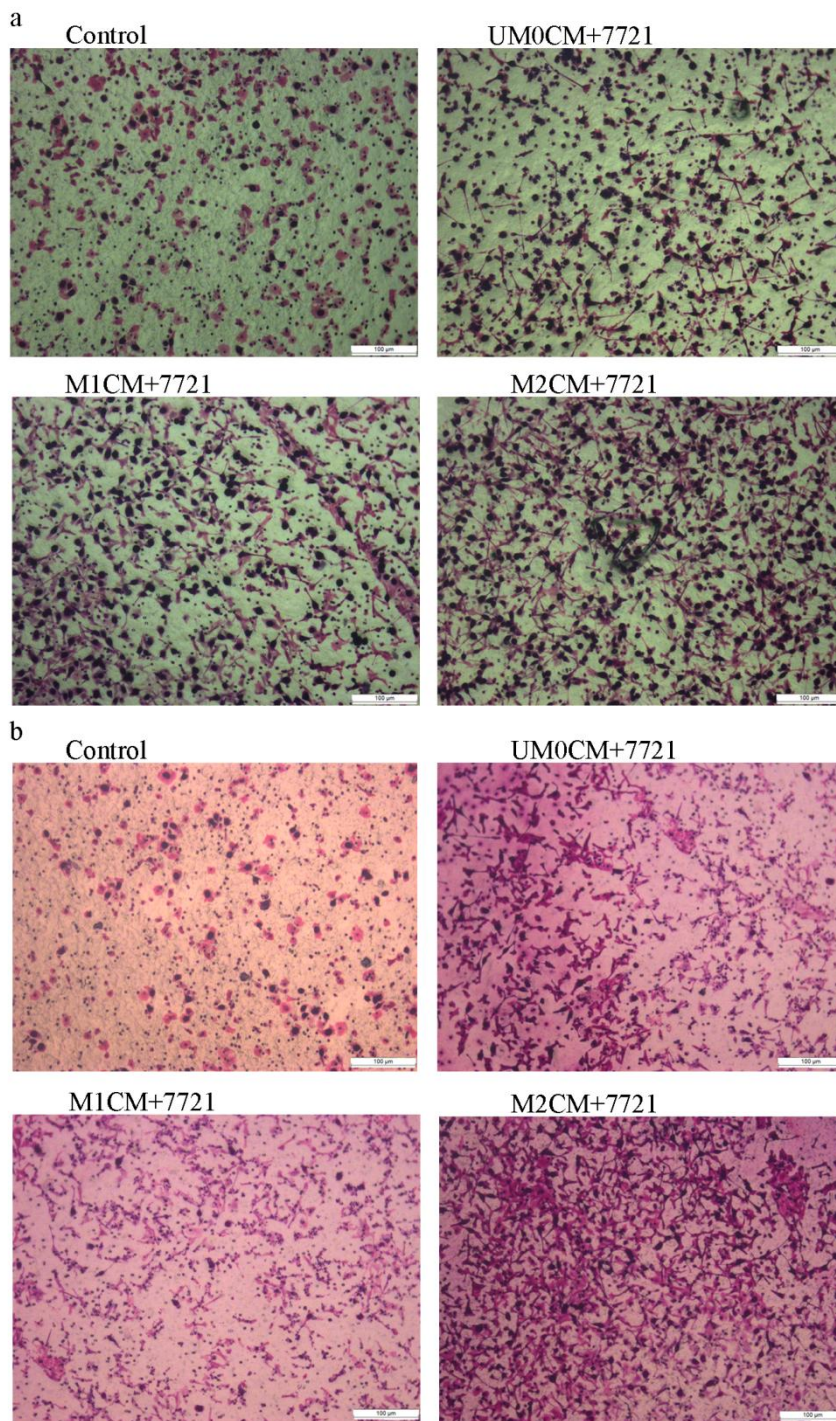

Figure S4 The morphology change of SMMC7721 cells during the migration and matrigel invasive assay. They were the larger fields of view of Figure 2a-b.

Table S1 Up-regulated proteins in 3D co-culture system.

| Accession no.      | Description                                                             | 119:118     | 119:121     | Family                    |
|--------------------|-------------------------------------------------------------------------|-------------|-------------|---------------------------|
| <b>IL8_HUMAN</b>   | <b>interleukin 8</b>                                                    | <b>3.48</b> | <b>6.96</b> | <b>cytokine</b>           |
| TNFA_HUMAN         | tumor necrosis factor                                                   | 2.14        | 4.92        | cytokine                  |
| RHOC_HUMAN         | ras homolog family member C                                             | 2.14        | 4.59        | enzyme                    |
| SDC2_HUMAN         | syndecan 2                                                              | 2.63        | 3.73        | other                     |
| TFPI2_HUMAN        | tissue factor pathway inhibitor 2                                       | 2.00        | 3.48        | other                     |
| <b>CXCL2_HUMAN</b> | <b>chemokine (C-X-C motif) ligand 2</b>                                 | <b>2.00</b> | <b>1.51</b> | <b>cytokine</b>           |
| CCL3_HUMAN         | chemokine (C-C motif) ligand 3                                          | 2.00        | 3.03        | cytokine                  |
| APOC2_HUMAN        | apolipoprotein C-II                                                     | 2.00        | 3.03        | transporter               |
| CADH9_HUMAN        | cadherin 9, type 2 (T1-cadherin)                                        | 2.29        | 3.03        | other                     |
| STC1_HUMAN         | stanniocalcin 1                                                         | 4.92        | 3.03        | other                     |
| SLAF7_HUMAN        | SLAM family member 7                                                    | 1.31        | 2.83        | other                     |
| UPAR_HUMAN         | plasminogen activator, urokinase receptor                               | 1.86        | 2.83        | transmembrane<br>receptor |
| LDLR_HUMAN         | low density lipoprotein receptor                                        | 2.14        | 2.83        | transporter               |
| SRGN_HUMAN         | serglycin                                                               | 2.29        | 2.83        | other                     |
| INHBA_HUMAN        | inhibin, beta A                                                         | 2.46        | 2.83        | growth factor             |
| E41L2_HUMAN        | erythrocyte membrane protein band 4.1-like 2                            | 2.46        | 2.64        | other                     |
| AMPN_HUMAN         | alanyl (membrane) aminopeptidase                                        | 1.41        | 2.46        | peptidase                 |
| LIF_HUMAN          | leukemia inhibitory factor                                              | 1.62        | 2.46        | cytokine                  |
| VASP_HUMAN         | vasodilator-stimulated phosphoprotein                                   | 1.74        | 2.46        | other                     |
| PI51C_HUMAN        | phosphatidylinositol-4-phosphate 5-kinase, type I, gamma                | 2.00        | 2.46        | kinase                    |
| AT2B1_HUMAN        | ATPase, Ca <sup>++</sup> transporting, plasma membrane 1                | 3.03        | 2.46        | transporter               |
| HOME3_HUMAN        | homer homolog 3 (Drosophila)                                            | 1.74        | 2.29        | other                     |
| OSTP_HUMAN         | secreted phosphoprotein 1                                               | 1.41        | 2.14        | cytokine                  |
| CD44_HUMAN         | CD44 molecule (Indian blood group)                                      | 1.62        | 2.14        | enzyme                    |
| LIRB2_HUMAN        | leukocyte immunoglobulin-like receptor, subfamily B (with TM and ITIM)  | 2.14        | 2.14        | other                     |
| APOE_HUMAN         | apolipoprotein E                                                        | 1.31        | 2.00        | transporter               |
| <b>IL1B_HUMAN</b>  | <b>interleukin 1, beta</b>                                              | <b>1.86</b> | <b>2.00</b> | <b>cytokine</b>           |
| E41L3_HUMAN        | erythrocyte membrane protein band 4.1-like 3                            | 2.29        | 2.00        | other                     |
| CD82_HUMAN         | CD82 molecule                                                           | 1.51        | 1.86        | other                     |
| CXCL5_HUMAN        | chemokine (C-X-C motif) ligand 5                                        | 1.51        | 1.86        | cytokine                  |
| GLSK_HUMAN         | glutaminase                                                             | 2.29        | 1.86        | ion channel               |
| ICLN_HUMAN         | chloride channel, nucleotide-sensitive, 1A                              | 2.46        | 1.86        | peptidase                 |
| TXLNA_HUMAN        | taxilin alpha                                                           | 3.48        | 1.86        | cytokine                  |
| C1QT1_HUMAN        | C1q and tumor necrosis factor related protein 1                         | 11.31       | 1.86        | other                     |
| OR1M1_HUMAN        | olfactory receptor, family 1, subfamily M, member 1                     | 1.31        | 0.8         | G-protein<br>receptor     |
| ADAM9_HUMAN        | ADAM metallopeptidase domain 9                                          | 1.62        | 0.8         | peptidase                 |
| GROA_HUMAN         | chemokine (C-X-C motif) ligand 1 (melanoma growth stimulating activity) | 1.74        | 0.8         | cytokine                  |
| TR19L_HUMAN        | RELT tumor necrosis factor receptor                                     | 4.00        | 0.8         | transmembrane<br>receptor |
| <b>HBEGF_HUMAN</b> | <b>heparin-binding EGF-like growth factor</b>                           | <b>1.41</b> | <b>3.03</b> | <b>growth factor</b>      |

|                   |                                                                             |             |             |                        |
|-------------------|-----------------------------------------------------------------------------|-------------|-------------|------------------------|
| ADEC1_HUMAN       | ADAM-like, decysin 1                                                        | 1.62        | 1.62        | peptidase              |
| EHD4_HUMAN        | EH-domain containing 4                                                      | 1.74        | 1.62        | enzyme                 |
| PAI1_HUMAN        | serpin peptidase inhibitor, clade E (nexin, plasminogen activator inhibitor | 2.14        | 1.62        | other                  |
| ITA5_HUMAN        | integrin, alpha 5 (fibronectin receptor, alpha polypeptide)                 | 1.31        | 1.51        | transmembrane receptor |
| VPS54_HUMAN       | vacuolar protein sorting 54 homolog ( <i>S. cerevisiae</i> )                | 1.41        | 1.51        | other                  |
| <b>IBP3_HUMAN</b> | <b>insulin-like growth factor binding protein 3</b>                         | <b>1.51</b> | <b>1.62</b> | <b>other</b>           |
| 1B15_HUMAN        | major histocompatibility complex, class I, B                                | 2.14        | 1.51        | transmembrane receptor |
| BMP1_HUMAN        | bone morphogenetic protein 1                                                | 1.31        | 1.41        | peptidase              |
| BASI_HUMAN        | basigin (Ok blood group)                                                    | 1.62        | 1.41        | transporter            |
| S4A7_HUMAN        | solute carrier family 4, sodium bicarbonate cotransporter, member 7         | 1.62        | 1.41        | transporter            |
| VGf_HUMAN         | VGf nerve growth factor inducible                                           | 1.62        | 1.41        | growth factor          |
| BIN2_HUMAN        | bridging integrator 2                                                       | 1.74        | 1.41        | other                  |
| VAT1_HUMAN        | vesicle amine transport 1                                                   | 1.31        | 1.31        | transporter            |
| FA96A_HUMAN       | family with sequence similarity 96, member A                                | 1.31        | 1.31        | other                  |
| ICAM1_HUMAN       | intercellular adhesion molecule 1                                           | 1.41        | 1.31        | transmembrane receptor |
| SAP_HUMAN         | prosaposin                                                                  | 1.41        | 1.31        | other                  |
| LIPB1_HUMAN       | PTPRF interacting protein, binding protein 1 (liprin beta 1)                | 1.41        | 1.31        | other                  |
| <b>MMP3_HUMAN</b> | <b>matrix metalloproteinase 3 (stromelysin 1, progelatinase)</b>            | <b>1.41</b> | <b>1.31</b> | <b>peptidase</b>       |
| TJAP1_HUMAN       | tight junction associated protein 1 (peripheral)                            | 1.41        | 1.31        | other                  |
| GRAP1_HUMAN       | GRIP1 associated protein 1                                                  | 1.41        | 1.31        | other                  |
| XIRP1_HUMAN       | xin actin-binding repeat containing 1                                       | 1.41        | 1.31        | other                  |
| UTRO_HUMAN        | utrophin                                                                    | 1.41        | 1.31        | transmembrane receptor |
| NKTR_HUMAN        | natural killer-tumor recognition sequence                                   | 1.41        | 1.31        | other                  |
| ANKY2_HUMAN       | ankyrin repeat and MYND domain containing 2                                 | 1.41        | 1.31        | other                  |

118, 118 isobaric tag, labeled the conditioned medium of M2; 119, 119 isobaric tag, labeled the conditioned medium of co-culture; 121, 121 isobaric tag, labeled the conditioned medium of SMMC7721 cells. 119:118, the fold change of proteins expressed in co-culture system when compared with the M2 culture system; 119:121, the fold change of proteins expressed in co-culture system when compared with the SMMC7721 culture system. Those in black were chosen for further verification.

Table S2 Down-regulated proteins in 3D co-culture system.

| Accession no. | Description                | 119:118 | 119:121 | Family                     |
|---------------|----------------------------|---------|---------|----------------------------|
| HTRA1_HUMAN   | HtrA serine peptidase 1    | 0.29    | 0.10    | peptidase                  |
| FZD6_HUMAN    | frizzled family receptor 6 | 0.54    | 0.14    | G-protein coupled receptor |

|             |                                                                             |      |      |                         |         |
|-------------|-----------------------------------------------------------------------------|------|------|-------------------------|---------|
| FETUA_HUMAN | alpha-2-HS-glycoprotein                                                     | 0.47 | 0.19 | other                   |         |
| NGAL_HUMAN  | Neutrophil gelatinase-associated lipocalin                                  | 0.57 | 0.22 | transporter             |         |
| ICAM5_HUMAN | intercellular adhesion molecule 5, telencephalin                            | 0.62 | 0.22 | other                   |         |
| LOXL2_HUMAN | lysyl oxidase-like 2                                                        | 0.66 | 0.25 | enzyme                  |         |
| AAAT_HUMAN  | solute carrier family 1 (neutral amino acid transporter), member 5          | 0.22 | 0.27 | transporter             |         |
| T2R60_HUMAN | taste receptor, type 2, member 60                                           | 0.47 | 0.27 | G-protein receptor      | coupled |
| GRASP_HUMAN | GRP1 (general receptor for phosphoinositides 1)-associated scaffold protein | 0.66 | 0.27 | other                   |         |
| O7E24_HUMAN | olfactory receptor, family 7, subfamily E, member 24                        | 0.62 | 0.29 | G-protein receptor      | coupled |
| C1QT6_HUMAN | C1q and tumor necrosis factor related protein 6                             | 0.66 | 0.29 | other                   |         |
| ALBU_HUMAN  | albumin                                                                     | 0.33 | 0.31 | transporter             |         |
| THBG_HUMAN  | s Thyroxine-binding globulin                                                | 0.35 | 0.31 | transporter             |         |
| PRTN3_HUMAN | proteinase 3                                                                | 0.35 | 0.31 | peptidase               |         |
| DDR1_HUMAN  | discoidin domain receptor tyrosine kinase 1                                 | 0.76 | 0.31 | kinase                  |         |
| TSP4_HUMAN  | thrombospondin 4                                                            | 0.35 | 0.35 | other                   |         |
| PCDA3_HUMAN | protocadherin alpha 3                                                       | 0.41 | 0.35 | other                   |         |
| AFAM_HUMAN  | afamin                                                                      | 0.50 | 0.35 | transporter             |         |
| PCDH7_HUMAN | protocadherin 7                                                             | 0.54 | 0.35 | other                   |         |
| USH1C_HUMAN | Usher syndrome 1C (autosomal recessive, severe)                             | 0.33 | 0.38 | other                   |         |
| MIF_HUMAN   | macrophage migration inhibitory factor (glycosylation-inhibiting factor)    | 0.44 | 0.41 | cytokine                |         |
| CFAD_HUMAN  | complement factor D (adipsin)                                               | 0.62 | 0.41 | peptidase               |         |
| RNAS4_HUMAN | ribonuclease, RNase A family, 4                                             | 0.62 | 0.41 | enzyme                  |         |
| REEP6_HUMAN | receptor accessory protein 6                                                | 0.27 | 0.44 | other                   |         |
| PLXA1_HUMAN | plexin A1                                                                   | 0.31 | 0.44 | transmembrane receptor  |         |
| PCDA1_HUMAN | protocadherin alpha 1                                                       | 0.44 | 0.44 | other                   |         |
| PVRL2_HUMAN | poliovirus receptor-related 2 (herpesvirus entry mediator B)                | 0.47 | 0.44 | transmembrane receptor  |         |
| PTPRM_HUMAN | protein tyrosine phosphatase, receptor type, M                              | 0.54 | 0.44 | phosphatase             |         |
| NOTC2_HUMAN | notch 2                                                                     | 0.54 | 0.44 | transcription regulator |         |
| CO4A2_HUMAN | collagen, type IV, alpha 2                                                  | 0.62 | 0.44 | other                   |         |
| 1A02_HUMAN  | major histocompatibility complex, class I, A                                | 0.18 | 0.47 | other                   |         |
| CBPM_HUMAN  | carboxypeptidase M                                                          | 0.29 | 0.47 | peptidase               |         |
| CHSTF_HUMAN | carbohydrate (N-acetylgalactosamine 4-sulfate 6-O) sulfotransferase 15      | 0.44 | 0.47 | enzyme                  |         |
| CBPD_HUMAN  | carboxypeptidase D                                                          | 0.50 | 0.47 | peptidase               |         |
| MRC2_HUMAN  | mannose receptor, C type 2                                                  | 0.66 | 0.47 | transmembrane receptor  |         |
| RAP2A_HUMAN | RAP2A, member of RAS oncogene family                                        | 0.47 | 0.50 | enzyme                  |         |
| FETA_HUMAN  | alpha-fetoprotein                                                           | 0.50 | 0.50 | transporter             |         |
| PTPRF_HUMAN | protein tyrosine phosphatase, receptor type, F                              | 0.62 | 0.50 | phosphatase             |         |
| USP9X_HUMAN | ubiquitin specific peptidase 9, X-linked                                    | 0.62 | 0.50 | peptidase               |         |
| MMP19_HUMAN | matrix metalloproteinase 19                                                 | 0.57 | 0.54 | peptidase               |         |
| IDE_HUMAN   | insulin-degrading enzyme                                                    | 0.66 | 0.54 | peptidase               |         |

|             |                                                                                      |      |      |                        |
|-------------|--------------------------------------------------------------------------------------|------|------|------------------------|
| KCAB2_HUMAN | potassium voltage-gated channel, shaker-related subfamily, beta member 2             | 0.62 | 0.57 | ion channel            |
| TIE1_HUMAN  | tyrosine kinase with immunoglobulin-like and EGF-like domains 1                      | 0.62 | 0.57 | kinase                 |
| MIME_HUMAN  | Mimecan                                                                              | 0.66 | 0.57 | growth factor          |
| VLDLR_HUMAN | very low density lipoprotein receptor                                                | 0.57 | 0.62 | transporter            |
| SCRN2_HUMAN | secernin 2                                                                           | 0.66 | 0.62 | other                  |
| ANGT_HUMAN  | angiotensinogen (serpin peptidase inhibitor, clade A, member 8)                      | 0.50 | 0.66 | growth factor          |
| MMP14_HUMAN | matrix metalloproteinase 14 (membrane-inserted)                                      | 0.66 | 0.66 | peptidase              |
| CXD3_HUMAN  | gap junction protein, delta 3                                                        | 2.83 | 0.14 | transporter            |
| SDC1_HUMAN  | syndecan 1                                                                           | 2.00 | 0.19 | enzyme                 |
| L1CAM_HUMAN | L1 cell adhesion molecule                                                            | 1.74 | 0.23 | other                  |
| FBLN1_HUMAN | Fibulin-1                                                                            | 2.14 | 0.25 | other                  |
| PPB1_HUMAN  | alkaline phosphatase, placental                                                      | 3.25 | 0.27 | phosphatase            |
| MUC18_HUMAN | melanoma cell adhesion molecule                                                      | 1.62 | 0.31 | other                  |
| SMOC1_HUMAN | SPARC related modular calcium binding 1                                              | 2.00 | 0.31 | other                  |
| VAPB_HUMAN  | VAMP (vesicle-associated membrane protein)-associated protein B and C                | 2.46 | 0.31 | other                  |
| LAMB1_HUMAN | laminin, beta 1                                                                      | 1.74 | 0.35 | other                  |
| BCAM_HUMAN  | basal cell adhesion molecule (Lutheran blood group)                                  | 1.74 | 0.35 | transmembrane receptor |
| DSG2_HUMAN  | desmoglein 2                                                                         | 1.32 | 0.38 | other                  |
| LAMA4_HUMAN | laminin, alpha 4                                                                     | 1.52 | 0.38 | enzyme                 |
| VAPA_HUMAN  | VAMP (vesicle-associated membrane protein)-associated protein A                      | 1.32 | 0.41 | other                  |
| APOA1_HUMAN | apolipoprotein A-I                                                                   | 1.32 | 0.41 | transporter            |
| CO7A1_HUMAN | collagen, type VII, alpha 1                                                          | 1.52 | 0.41 | other                  |
| FBN1_HUMAN  | fibrillin 1                                                                          | 1.41 | 0.44 | other                  |
| SCAPE_HUMAN | S-phase cyclin A-associated protein in the ER                                        | 1.41 | 0.44 | other                  |
| PRG4_HUMAN  | proteoglycan 4                                                                       | 1.41 | 0.50 | other                  |
| C1S_HUMAN   | complement component 1, s subcomponent                                               | 1.52 | 0.50 | peptidase              |
| TRFE_HUMAN  | transferrin                                                                          | 1.74 | 0.50 | transporter            |
| LG3BP_HUMAN | lectin, galactoside-binding, soluble, 3 binding protein                              | 1.87 | 0.50 | transmembrane receptor |
| AT2B4_HUMAN | ATPase, Ca <sup>++</sup> transporting, plasma membrane 4                             | 1.87 | 0.50 | transporter            |
| TFPI1_HUMAN | tissue factor pathway inhibitor (lipoprotein-associated coagulation inhibitor)       | 1.87 | 0.50 | other                  |
| PCDH1_HUMAN | protocadherin 1                                                                      | 1.87 | 0.54 | other                  |
| PGS2_HUMAN  | decorin                                                                              | 1.62 | 0.57 | other                  |
| FIBA_HUMAN  | fibrinogen alpha chain                                                               | 1.62 | 0.57 | other                  |
| TRFM_HUMAN  | antigen p97 (melanoma associated) identified by monoclonal antibodies 133.2 and 96.5 | 1.62 | 0.57 | other                  |
| CYR61_HUMAN | cysteine-rich, angiogenic inducer, 61                                                | 1.74 | 0.57 | other                  |
| LAMC1_HUMAN | laminin, gamma 1 (formerly LAMB2)                                                    | 1.87 | 0.57 | other                  |
| FSTL1_HUMAN | follistatin-like 1                                                                   | 4.92 | 0.57 | other                  |
| IGHA1_HUMAN | immunoglobulin heavy constant alpha 1                                                | 1.41 | 0.62 | other                  |
| CBPA4_HUMAN | carboxypeptidase A4                                                                  | 1.74 | 0.62 | peptidase              |

|             |                                                                                        |      |      |                        |
|-------------|----------------------------------------------------------------------------------------|------|------|------------------------|
| IBP7_HUMAN  | insulin-like growth factor binding protein 7                                           | 2.00 | 0.62 | transporter            |
| MAGD2_HUMAN | melanoma antigen family D, 2                                                           | 1.41 | 0.66 | other                  |
| DAF_HUMAN   | CD55 molecule, decay accelerating factor for complement (Cromer blood group)           | 1.41 | 0.66 | other                  |
| SSFA2_HUMAN | sperm specific antigen 2                                                               | 1.62 | 0.66 | other                  |
| CO1A1_HUMAN | collagen, type I, alpha 1                                                              | 1.87 | 0.66 | other                  |
| CH3L1_HUMAN | chitinase 3-like 1 (cartilage glycoprotein-39)                                         | 0.66 | 1.32 | enzyme                 |
| A2MG_HUMAN  | alpha-2-macroglobulin                                                                  | 0.62 | 1.41 | transporter            |
| CLC11_HUMAN | C-type lectin domain family 11, member A                                               | 0.66 | 1.41 | growth factor          |
| SEM7A_HUMAN | semaphorin 7A, GPI membrane anchor (John Milton Hagen blood group)                     | 0.57 | 1.62 | transmembrane receptor |
| MMP9_HUMAN  | matrix metalloproteinase 9 (gelatinase B, 92kDa gelatinase, 92kDa type IV collagenase) | 0.50 | 1.62 | peptidase              |
| CSF1R_HUMAN | colony stimulating factor 1 receptor                                                   | 0.57 | 1.62 | kinase                 |
| KLRF1_HUMAN | killer cell lectin-like receptor subfamily F, member 1                                 | 0.57 | 1.74 | transmembrane receptor |
| REEP5_HUMAN | receptor accessory protein 5                                                           | 0.23 | 1.87 | transporter            |
| TIMP1_HUMAN | TIMP metalloproteinase inhibitor 1                                                     | 0.62 | 1.87 | other                  |
| CAP1_HUMAN  | CAP, adenylate cyclase-associated protein 1 (yeast)                                    | 0.54 | 2.46 | other                  |
| PNOC_HUMAN  | prepronociceptin                                                                       | 0.62 | 3.25 | other                  |

118, 118 isobaric tag, labeled the conditioned medium of M2; 119, 119 isobaric tag, labeled the conditioned medium of co-culture;

121=121 isobaric tag, labeled the conditioned medium of SMMC7721 cells. 119:118, the fold change of proteins expressed in co-culture system when compared with the M2 culture system; 119:121, the fold change of proteins expressed in co-culture system when compared with the SMMC7721 culture system.
